# Supplementary material for: The association between gallstones and cardiovascular disease: evidence from the latest NHANES data
Source: Research Square preprint supplement (doi:10.21203/rs.3.rs-7094894/v1), 2025-07-28
Supplement: Supplementary file 1 [file 0f04da84f4b15cd9fe3fd115.docx]

Supplemental Material

Table S1. Subgroup analysis results of the association between gallstones and congestive heart failure.

| Variable | Estimate | Std. Error | t value | *P-value* | Interaction-*Pval* | |
| --- | --- | --- | --- | --- | --- | --- |
| Sex |  |  |  |  | | 0.131 |
| Female | 1.092 | 0.178 | 6.131 | <0.001 | |  |
| Male | 0.655 | 0.266 | 2.464 | 0.018 | |  |
| Age, years |  |  |  |  | | 0.142 |
| <60 | 0.879 | 0.350 | 2.513 | 0.016 | |  |
| >=60 | 0.284 | 0.165 | 1.719 | 0.094 | |  |
| Race |  |  |  |  | | 0.371 |
| Mexican American | 1.805 | 0.668 | 2.704 | 0.011 | |  |
| Non-Hispanic Black | 0.896 | 0.263 | 3.406 | 0.002 | |  |
| Non-Hispanic White | 0.675 | 0.209 | 3.227 | 0.003 | |  |
| Other Hispanic | 1.475 | 0.492 | 2.995 | 0.005 | |  |
| Other Race - Including Multi-Racial | 0.982 | 0.622 | 1.579 | 0.123 | |  |
| Education |  |  |  |  | | 0.051 |
| Less than 9th grade | 0.996 | 0.528 | 1.887 | 0.067 | |  |
| 9-11th grade (Includes 12th grade with no diploma) | 0.887 | 0.397 | 2.235 | 0.031 | |  |
| High school graduate/GED or equivalent | 0.271 | 0.296 | 0.915 | 0.366 | |  |
| Some college or AA degree | 0.606 | 0.248 | 2.440 | 0.019 | |  |
| College graduate or above | 1.710 | 0.396 | 4.318 | <0.001 | |  |
| PIR |  |  |  |  | | 0.103 |
| <1.3 | 1.202 | 0.301 | 3.993 | <0.001 | |  |
| 1.3-3.49 | 0.472 | 0.198 | 2.377 | 0.022 | |  |
| >=3.5 | 0.768 | 0.292 | 2.634 | 0.012 | |  |
| Alcohol |  |  |  |  | | 0.533 |
| Never | 1.229 | 0.410 | 2.996 | 0.005 | |  |
| Former | 0.708 | 0.195 | 3.627 | 0.001 | |  |
| Now | 0.685 | 0.344 | 1.992 | 0.053 | |  |
| BMI, kg/m2 |  |  |  |  | | **0.013** |
| <25 | 1.727 | 0.423 | 4.083 | <0.001 | |  |
| 25-29 | 0.492 | 0.271 | 1.817 | 0.077 | |  |
| >=30 | 0.492 | 0.166 | 2.971 | 0.005 | |  |
| Hypertension |  |  |  |  | | **0.037** |
| No | 1.329 | 0.396 | 3.359 | 0.002 | |  |
| Yes | 0.337 | 0.176 | 1.912 | 0.063 | |  |
| SBP, mmHg |  |  |  |  | | 0.740 |
| <140 | 0.717 | 0.160 | 4.483 | <0.001 | |  |
| >=140 | 0.808 | 0.292 | 2.765 | 0.009 | |  |
| Diabetes |  |  |  |  | | 0.052 |
| No | 0.828 | 0.190 | 4.364 | <0.001 | |  |
| Yes | 0.218 | 0.240 | 0.906 | 0.371 | |  |
| HbA1c, % |  |  |  |  | | **0.018** |
| <6.5 | 0.885 | 0.163 | 5.424 | <0.001 | |  |
| >=6.5 | 0.174 | 0.294 | 0.592 | 0.557 | |  |
| HDL, mmol/L |  |  |  |  | | 0.128 |
| <=1.55 | 0.676 | 0.172 | 3.932 | <0.001 | |  |
| >1.55 | 1.173 | 0.299 | 3.927 | <0.001 | |  |
| Sitting time, min/day |  |  |  |  | | 0.986 |
| <=480 | 0.795 | 0.154 | 5.157 | <0.001 | |  |
| >480 | 0.791 | 0.274 | 2.882 | 0.006 | |  |
| Smoke |  |  |  |  | | 0.245 |
| Never | 1.038 | 0.237 | 4.389 | <0.001 | |  |
| Former | 0.541 | 0.232 | 2.333 | 0.025 | |  |
| Now | 0.492 | 0.384 | 1.281 | 0.208 | |  |
| TC, mmol/L |  |  |  |  | | 0.550 |
| <=6.2 | 0.763 | 0.155 | 4.920 | <0.001 | |  |
| >6.2 | 1.053 | 0.484 | 2.178 | 0.036 | |  |

PIR, the ratio of family income to poverty; SBP, systolic blood pressure; TC, total cholesterol; HDL, high-density lipoprotein; HbA1c, glycohemoglobin

Table S2. Subgroup analysis results of the association between gallstones and coronary heart disease.

| Variable | Estimate | Std. Error | t value | *P-value* | Interaction-*Pval* |
| --- | --- | --- | --- | --- | --- |
| Sex |  |  |  |  | 0.195 |
| Female | 0.768 | 0.256 | 3.005 | 0.005 |  |
| Male | 1.149 | 0.189 | 6.093 | <0.001 |  |
| Age, years |  |  |  |  | 0.670 |
| <60 | 0.439 | 0.426 | 1.029 | 0.310 |  |
| >=60 | 0.240 | 0.158 | 1.514 | 0.138 |  |
| Race |  |  |  |  | 0.331 |
| Mexican American | 0.571 | 0.557 | 1.025 | 0.314 |  |
| Non-Hispanic Black | 0.628 | 0.389 | 1.614 | 0.115 |  |
| Non-Hispanic White | 0.599 | 0.170 | 3.519 | 0.001 |  |
| Other Hispanic | 1.267 | 0.365 | 3.473 | 0.001 |  |
| Other Race - Including Multi-Racial | 1.127 | 0.425 | 2.650 | 0.012 |  |
| Education |  |  |  |  | **0.002** |
| Less than 9th grade | 0.509 | 0.554 | 0.918 | 0.364 |  |
| 9-11th grade (Includes 12th grade with no diploma) | 0.536 | 0.332 | 1.614 | 0.115 |  |
| High school graduate/GED or equivalent | -0.045 | 0.330 | -0.136 | 0.893 |  |
| Some college or AA degree | 0.733 | 0.191 | 3.848 | <0.001 |  |
| College graduate or above | 1.455 | 0.270 | 5.385 | <0.001 |  |
| PIR |  |  |  |  | 0.179 |
| <1.3 | 0.655 | 0.245 | 2.674 | 0.011 |  |
| 1.3-3.49 | 0.517 | 0.222 | 2.333 | 0.025 |  |
| >=3.5 | 0.918 | 0.167 | 5.487 | <0.001 |  |
| Alcohol |  |  |  |  | 0.763 |
| Never | 1.018 | 0.462 | 2.202 | 0.034 |  |
| Former | 0.646 | 0.192 | 3.371 | 0.002 |  |
| Now | 0.716 | 0.291 | 2.457 | 0.019 |  |
| BMI, kg/m2 |  |  |  |  | 0.150 |
| <25 | 1.254 | 0.511 | 2.454 | 0.019 |  |
| 25-29 | 0.856 | 0.225 | 3.799 | <0.001 |  |
| >=30 | 0.381 | 0.192 | 1.982 | 0.055 |  |
| Hypertension |  |  |  |  | 0.122 |
| No | 0.904 | 0.315 | 2.866 | 0.007 |  |
| Yes | 0.321 | 0.168 | 1.910 | 0.063 |  |
| SBP, mmHg |  |  |  |  | 0.126 |
| <140 | 0.775 | 0.160 | 4.838 | <0.001 |  |
| >=140 | 0.367 | 0.246 | 1.490 | 0.144 |  |
| Diabetes |  |  |  |  | **0.020** |
| No | 0.781 | 0.221 | 3.531 | 0.001 |  |
| Yes | 0.102 | 0.189 | 0.538 | 0.594 |  |
| HbA1c, % |  |  |  |  | 0.573 |
| <6.5 | 0.659 | 0.207 | 3.183 | 0.003 |  |
| >=6.5 | 0.421 | 0.309 | 1.363 | 0.181 |  |
| HDL, mmol/L |  |  |  |  | 0.296 |
| <=1.55 | 0.739 | 0.161 | 4.579 | <0.001 |  |
| >1.55 | 0.443 | 0.252 | 1.759 | 0.086 |  |
| Sitting time, min/day |  |  |  |  | 0.960 |
| <=480 | 0.709 | 0.130 | 5.449 | <0.001 |  |
| >480 | 0.726 | 0.383 | 1.896 | 0.065 |  |
| Smoke |  |  |  |  | 0.124 |
| Never | 1.027 | 0.234 | 4.388 | <0.001 |  |
| Former | 0.367 | 0.252 | 1.459 | 0.153 |  |
| Now | 0.308 | 0.457 | 0.674 | 0.504 |  |
| TC, mmol/L |  |  |  |  | 0.596 |
| <=6.2 | 0.718 | 0.153 | 4.678 | <0.001 |  |
| >6.2 | 0.425 | 0.521 | 0.815 | 0.420 |  |

PIR, the ratio of family income to poverty; SBP, systolic blood pressure; TC, total cholesterol; HDL, high-density lipoprotein; HbA1c, glycohemoglobin

Table S3. Subgroup analysis results of the association between gallstones and angina pectoris.

| Variable | Estimate | Std. Error | t value | *P-value* | Interaction-*Pval* |
| --- | --- | --- | --- | --- | --- |
| Sex |  |  |  |  | 0.824 |
| Female | 1.569 | 0.257 | 6.095 | <0.001 |  |
| Male | 1.664 | 0.275 | 6.047 | <0.001 |  |
| Age, years |  |  |  |  | 0.812 |
| <60 | 1.147 | 0.335 | 3.425 | 0.001 |  |
| >=60 | 1.062 | 0.139 | 7.638 | <0.001 |  |
| Race |  |  |  |  | 0.900 |
| Mexican American | 1.839 | 0.499 | 3.684 | 0.001 |  |
| Non-Hispanic Black | 1.271 | 0.469 | 2.712 | 0.010 |  |
| Non-Hispanic White | 1.318 | 0.203 | 6.495 | <0.001 |  |
| Other Hispanic | 1.686 | 0.454 | 3.715 | 0.001 |  |
| Other Race - Including Multi-Racial | 1.350 | 0.682 | 1.979 | 0.055 |  |
| Education |  |  |  |  | 0.051 |
| Less than 9th grade | 1.340 | 0.580 | 2.308 | 0.026 |  |
| 9-11th grade (Includes 12th grade with no diploma) | 0.971 | 0.351 | 2.769 | 0.009 |  |
| High school graduate/GED or equivalent | 0.784 | 0.271 | 2.892 | 0.006 |  |
| Some college or AA degree | 1.541 | 0.278 | 5.537 | <0.001 |  |
| College graduate or above | 1.984 | 0.313 | 6.336 | <0.001 |  |
| PIR |  |  |  |  | 0.528 |
| <1.3 | 1.103 | 0.313 | 3.523 | 0.001 |  |
| 1.3-3.49 | 1.326 | 0.206 | 6.431 | <0.001 |  |
| >=3.5 | 1.545 | 0.238 | 6.503 | <0.001 |  |
| Alcohol |  |  |  |  | 0.305 |
| Never | 1.362 | 0.628 | 2.169 | 0.036 |  |
| Former | 1.501 | 0.178 | 8.435 | <0.001 |  |
| Now | 0.849 | 0.265 | 3.201 | 0.003 |  |
| BMI, kg/m2 |  |  |  |  | 0.469 |
| <25 | 1.785 | 0.858 | 2.080 | 0.044 |  |
| 25-29 | 1.588 | 0.222 | 7.155 | <0.001 |  |
| >=30 | 1.072 | 0.237 | 4.534 | <0.001 |  |
| Hypertension |  |  |  |  | 0.414 |
| No | 1.361 | 0.321 | 4.235 | <0.001 |  |
| Yes | 1.053 | 0.155 | 6.790 | <0.001 |  |
| SBP, mmHg |  |  |  |  | 0.051 |
| <140 | 1.511 | 0.149 | 10.142 | <0.001 |  |
| >=140 | 0.856 | 0.302 | 2.837 | 0.007 |  |
| Diabetes |  |  |  |  | 0.549 |
| No | 1.270 | 0.167 | 7.619 | <0.001 |  |
| Yes | 1.039 | 0.291 | 3.572 | 0.001 |  |
| HbA1c, % |  |  |  |  | 0.964 |
| <6.5 | 1.276 | 0.150 | 8.500 | <0.001 |  |
| >=6.5 | 1.252 | 0.458 | 2.736 | 0.009 |  |
| HDL, mmol/L |  |  |  |  | 0.518 |
| <=1.55 | 1.427 | 0.184 | 7.757 | <0.001 |  |
| >1.55 | 1.073 | 0.449 | 2.387 | 0.022 |  |
| Sitting time, min/day |  |  |  |  | 0.459 |
| <=480 | 1.336 | 0.141 | 9.451 | <0.001 |  |
| >480 | 1.673 | 0.419 | 3.992 | <0.001 |  |
| Smoke |  |  |  |  | 0.182 |
| Never | 1.745 | 0.238 | 7.319 | <0.001 |  |
| Former | 1.175 | 0.275 | 4.268 | <0.001 |  |
| Now | 0.792 | 0.510 | 1.552 | 0.129 |  |
| TC, mmol/L |  |  |  |  | 0.251 |
| <=6.2 | 1.417 | 0.138 | 10.242 | <0.001 |  |
| >6.2 | 0.962 | 0.378 | 2.546 | 0.015 |  |

PIR, the ratio of family income to poverty; SBP, systolic blood pressure; TC, total cholesterol; HDL, high-density lipoprotein; HbA1c, glycohemoglobin

Table S4. Subgroup analysis results of the association between gallstones and myocardial infarction.

| Variable | Estimate | Std. Error | t value | *P-value* | Interaction-*Pval* |
| --- | --- | --- | --- | --- | --- |
| Sex |  |  |  |  | 0.462 |
| Female | 0.998 | 0.245 | 4.074 | <0.001 |  |
| Male | 0.757 | 0.225 | 3.357 | 0.002 |  |
| Age, years |  |  |  |  | 0.105 |
| <60 | 0.842 | 0.353 | 2.384 | 0.022 |  |
| >=60 | 0.099 | 0.199 | 0.500 | 0.620 |  |
| Race |  |  |  |  | **0.048** |
| Mexican American | 1.145 | 0.651 | 1.759 | 0.089 |  |
| Non-Hispanic Black | 1.037 | 0.300 | 3.452 | 0.001 |  |
| Non-Hispanic White | 0.530 | 0.175 | 3.027 | 0.004 |  |
| Other Hispanic | 1.433 | 0.383 | 3.738 | 0.001 |  |
| Other Race - Including Multi-Racial | 0.028 | 0.461 | 0.060 | 0.952 |  |
| Education |  |  |  |  | 0.156 |
| Less than 9th grade | 0.736 | 0.555 | 1.326 | 0.192 |  |
| 9-11th grade (Includes 12th grade with no diploma) | 0.585 | 0.354 | 1.652 | 0.107 |  |
| High school graduate/GED or equivalent | 0.165 | 0.258 | 0.640 | 0.526 |  |
| Some college or AA degree | 0.612 | 0.269 | 2.275 | 0.028 |  |
| College graduate or above | 1.227 | 0.334 | 3.675 | 0.001 |  |
| PIR |  |  |  |  | 0.990 |
| <1.3 | 0.569 | 0.267 | 2.134 | 0.039 |  |
| 1.3-3.49 | 0.611 | 0.191 | 3.193 | 0.003 |  |
| >=3.5 | 0.627 | 0.354 | 1.769 | 0.085 |  |
| Alcohol |  |  |  |  | 0.937 |
| Never | 0.439 | 0.583 | 0.752 | 0.456 |  |
| Former | 0.626 | 0.184 | 3.395 | 0.002 |  |
| Now | 0.647 | 0.288 | 2.248 | 0.030 |  |
| BMI, kg/m2 |  |  |  |  | 0.558 |
| <25 | 0.633 | 0.404 | 1.566 | 0.125 |  |
| 25-29 | 0.745 | 0.294 | 2.537 | 0.015 |  |
| >=30 | 0.433 | 0.181 | 2.400 | 0.021 |  |
| Hypertension |  |  |  |  | 0.277 |
| No | 0.659 | 0.294 | 2.241 | 0.031 |  |
| Yes | 0.293 | 0.176 | 1.663 | 0.104 |  |
| SBP, mmHg |  |  |  |  | 0.232 |
| <140 | 0.676 | 0.179 | 3.780 | 0.001 |  |
| >=140 | 0.383 | 0.220 | 1.738 | 0.090 |  |
| Diabetes |  |  |  |  | 0.943 |
| No | 0.347 | 0.234 | 1.484 | 0.146 |  |
| Yes | 0.365 | 0.187 | 1.954 | 0.058 |  |
| HbA1c, % |  |  |  |  | 0.733 |
| <6.5 | 0.547 | 0.209 | 2.620 | 0.012 |  |
| >=6.5 | 0.433 | 0.252 | 1.722 | 0.093 |  |
| HDL, mmol/L |  |  |  |  | 0.687 |
| <=1.55 | 0.639 | 0.161 | 3.959 | <0.001 |  |
| >1.55 | 0.515 | 0.311 | 1.654 | 0.106 |  |
| Sitting time, min/day |  |  |  |  | 0.976 |
| <=480 | 0.646 | 0.195 | 3.315 | 0.002 |  |
| >480 | 0.634 | 0.317 | 2.003 | 0.052 |  |
| Smoke |  |  |  |  | 0.756 |
| Never | 0.728 | 0.259 | 2.807 | 0.008 |  |
| Former | 0.524 | 0.255 | 2.054 | 0.047 |  |
| Now | 0.411 | 0.344 | 1.193 | 0.240 |  |
| TC, mmol/L |  |  |  |  | 0.599 |
| <=6.2 | 0.663 | 0.163 | 4.064 | <0.001 |  |
| >6.2 | 0.355 | 0.582 | 0.610 | 0.545 |  |

PIR, the ratio of family income to poverty; SBP, systolic blood pressure; TC, total cholesterol; HDL, high-density lipoprotein; HbA1c, glycohemoglobin
